# Supplementary material for: 18F-FMISO-PET Hypoxia Monitoring for Head-and-Neck Cancer Patients: Radiomics Analyses Predict the Outcome of Chemo-Radiotherapy
Source: MDPI journal article supplement (doi:10.3390/cancers13143449), 2021-07-09
Supplement: s1 [file s1]

Supplementary Materials

# **<sup>18</sup>F-FMISO-PET Hypoxia Monitoring for Head-and-Neck Cancer Patients: Radiomics Analyses Predict the Outcome of Chemo-Radiotherapy**

Montserrat Carles, Tobias Fechter, Anca L. Grosu, Arnd Soerensen, Benedikt Thomann, Raluca G. Stoian, Nicole Wiedenmann, Alexander Rühle, Constantinos Zamboglou, Juri Ruf, Luis Martí-Bonmati, Dimos Baltas, Michael Mix and Nils H. Nicolay

**Table S1.** Radiomics Features.

|               |                                                                                                                                                                                                                                                                                                                                                                                                                                                                |
|---------------|----------------------------------------------------------------------------------------------------------------------------------------------------------------------------------------------------------------------------------------------------------------------------------------------------------------------------------------------------------------------------------------------------------------------------------------------------------------|
| SUV-Histogram | Maximum SUV (SUV <sub>max</sub> ), Peak SUV (SUV <sub>peak</sub> ), Minimum SUV (SUV <sub>min</sub> ), Mean SUV (SUV <sub>mean</sub> ), Volume (V), Total Lesion <sup>18</sup> F-FMISO (TLF), Area under the curve of the cumulative SUV-volume histogram (AUC <sub>CSH</sub> ), Skewedness (S), Coefficient of variance (CoV), Kurtosis (K), Integral Uniformity (IU), Differential Uniformity (DU), Energy (E <sub>H</sub> ) and Entropy (Ent <sub>H</sub> ) |
| GLCM          | Local Homogeneity (LH), Correlation (C <sub>CM</sub> ), Contrast (Con <sub>CM</sub> ), Energy (E <sub>CM</sub> ), Entropy (Ent <sub>CM</sub> ), Variance (Var <sub>CM</sub> ), Autocorrelation (Acor) and Dissimilarity (D)                                                                                                                                                                                                                                    |
| GLRLM         | Short Run Emphasis (SRE), Long Run Emphasis (LRE), Low Gray-Level Run Emphasis (LGRE), High Gray-Level Run Emphasis (HGRE), Short Run Low Gray-Level Emphasis (SRLGE), Short Run High Gray-Level Emphasis (SRHGE), Long Run Low Gray-Level Emphasis (LRLGE), Long Run High Gray-Level Emphasis (LRHGE), Gray-Level Non-uniformity (GLN), Run Percentage (RP), Length Non-uniformity (RLN)                                                                      |
| GLSZM         | Small Zone Emphasis (SZE), Large Zone Emphasis (LZE), Low Gray-Level Zone Emphasis (LGZE), High Gray-Level Zone Emphasis (HGZE), Small Zone Low Gray-Level Emphasis (SZLGE), Small Zone High Gray-Level Emphasis (SZHGE), Large Zone Low Gray-Level Emphasis (LZLGE), Large Zone High Gray-Level Emphasis (LZHGE), Zone-Size Non-uniformity (ZSN), Zone Percentage (ZP), Gray-Level Variance (GLV) and Zone-Size Variance (ZSV)                                |
| NGTDM         | Coarseness (Coar), Contrast (Con <sub>NM</sub> ), Complexity (Comp) and Texture Strength (TS)                                                                                                                                                                                                                                                                                                                                                                  |

Abbreviations: SUV: standardized uptake values, GLCM: gray-level co-occurrence matrix, GLRLM: gray-level run length matrix, GLSZM: gray-level size zone matrix, NGTDM: neighborhood gray tone difference matrix.

**Table S2.** Radiomics features with prognostic value at W2 in the initial cohort.

|     |                                                                                                                                                        |
|-----|--------------------------------------------------------------------------------------------------------------------------------------------------------|
| OS  | DICE, Energy, C <sub>CM</sub> , LZE, LZLGE, WFGLV                                                                                                      |
| PFS | DICE, C <sub>CM</sub> , LZLGE, WF-C <sub>CM</sub> , WF-GLV, WF-GLV2, WF-Busyness, Q-SZLGE, Q-LGRE, QSRLGE                                              |
| LR  | LGZE, DU, SZLGE, SRLGE, LGRE, LRLGE, WF-SZLGE, WF-GLV2, Q-SZLGE, LZLGE, WF-LZHGE, WF-LGRE, WF-SRLGE, WF-LGZE, WF-LRLGE, Q-LGZE, C <sub>CM</sub> , GLV2 |
| DM  | DICE, Q-C <sub>CM</sub>                                                                                                                                |

Abbreviations: OS: overall survival, PFS: progression free survival, LR: local recurrence and DM: distant metastasis.

| Outcome |                         |                                  |                        |                           | W2         |                                                                              | W5         |                                                                              | W2 vs W5 |
|---------|-------------------------|----------------------------------|------------------------|---------------------------|------------|------------------------------------------------------------------------------|------------|------------------------------------------------------------------------------|----------|
| Patient | Locoregional recurrence | Distant metastasis free survival | Free Survival (months) | Overall Survival (months) | $\Delta V$ | CP<br>(DICE for estable, Sens for increasing and PPV for decreasing hypoxia) | $\Delta V$ | CP<br>(DICE for estable, Sens for increasing and PPV for decreasing hypoxia) |          |
| P01     |                         |                                  | 60                     | 60                        | -1         |                                                                              | 236        |                                                                              |          |
| P02     |                         |                                  | 59                     | 59                        | 281        |                                                                              | 319        |                                                                              |          |
| P03     |                         |                                  | 61                     | 61                        | -68        |                                                                              | 109        |                                                                              |          |
| P04     | 1                       |                                  | 8                      | 58                        | 22         |                                                                              | -100       |                                                                              |          |
| P05     | 1                       |                                  | 11                     | 55                        | 16         |                                                                              | -100       |                                                                              |          |
| P06     | 1                       | 1                                | 7                      | 34                        | -92        |                                                                              | -100       |                                                                              |          |
| P07     |                         |                                  | 5                      | 9                         | -100       |                                                                              | -98        |                                                                              |          |
| P08     |                         |                                  | 49                     | 49                        | -82        |                                                                              | -84        |                                                                              |          |
| P09     |                         | 1                                | 44                     | 44                        | -93        |                                                                              | -100       |                                                                              |          |
| P10     | 1                       | 1                                | 10                     | 24                        | -70        |                                                                              | -98        |                                                                              |          |
| P11     | 1                       |                                  | 10                     | 16                        | 136        |                                                                              | -74        |                                                                              |          |
| P12     | 1                       |                                  | 8                      | 12                        | -96        |                                                                              | -100       |                                                                              |          |
| P13     |                         |                                  | 41                     | 41                        | -93        |                                                                              | -100       |                                                                              |          |
| P14     | 1                       | 1                                | 7                      | 30                        | 0          |                                                                              | 0          |                                                                              |          |
| P15     |                         | 1                                | 3                      | 16                        | -95        |                                                                              | 324        |                                                                              |          |
| P16     | 1                       |                                  | 8                      | 31                        | -99        |                                                                              | -100       |                                                                              |          |
| P17     | 1                       |                                  | 17                     | 30                        | -78        |                                                                              | -89        |                                                                              |          |
| P18     |                         |                                  | 27                     | 27                        | 96         |                                                                              | -40        |                                                                              |          |
| P19     | 1                       |                                  | 14                     | 28                        | -43        |                                                                              | -86        |                                                                              |          |
| P20     | 1                       | 1                                | 10                     | 18                        | -16        |                                                                              | -100       |                                                                              |          |
| P21     | 1                       |                                  | 8                      | 17                        | -12        |                                                                              | -68        |                                                                              |          |
| P22     |                         |                                  | 23                     | 24                        | -48        |                                                                              | -58        |                                                                              |          |
| P23     |                         |                                  | 18                     | 19                        | 41         |                                                                              | -18        |                                                                              |          |
| P24     |                         |                                  | 19                     | 19                        | -90        |                                                                              | -100       |                                                                              |          |
| P25     |                         |                                  | 14                     | 15                        | -97        |                                                                              | -34        |                                                                              |          |

  

| Status based on $\Delta V$ |                           |  |  |  |
|----------------------------|---------------------------|--|--|--|
| Increasing (IH):           | $\Delta V \geq 15\%$      |  |  |  |
| Stable (SH):               | $15\% > \Delta V > -15\%$ |  |  |  |
| Decreasing (DH):           | $-15\% \geq \Delta V$     |  |  |  |

  

| Status based on CP                     |               |
|----------------------------------------|---------------|
| Static, geographically Stable (gS):    | CP $\geq 0.6$ |
| Dynamic, geographically unstable (gD): | $0.60 > CP$   |
| Without hypoxic region                 |               |

  

|                  |
|------------------|
| Different Status |
| Same status      |

Figure S1. Hypoxia variation status and treatment outcome for each patient and in each week.
